# Supplementary material for: Mechanisms of photoisomerization of the prenylated flavin mononucleotide cofactor: a theoretical study
Source: Royal Society of Chemistry journal article supplement (doi:10.1039/d4ra02035a), 2024-01-01
Supplement: d4ra02035a1.pdf [file d4ra02035a1.pdf]

***Electronic Supplementary Information (ESI)***

***Mechanisms of photoisomerization of the prenylated flavin  
mononucleotide cofactor: A theoretical study†***

*by*

*Pannipa Panajapo*

*Phorntep Promma*

*and*

*Kritsana Sagarik\**

*School of Chemistry*

*Institute of Science*

*Suranaree University of Technology*

*Nakhon Ratchasima 30000*

*Thailand*

\*corresponding author: *kritsana@sut.ac.th*

Tel./Fax: (6681) 8783994

**Figure S1** The  $S_0$  PESs for the intramolecular proton transfer and concerted covalent bond dissociations ( $St0 \rightarrow St1^{Int} \rightarrow St2^{Int}$ ) in Type **(1)** mechanism<sup>5</sup> (Figure 1), obtained from the DFT/B3LYP/DZP reaction path optimizations.

a)  $C_{1'}^{prFMN} - H \dots O^{prFMN^{im}}$  intramolecular proton transfer in **prFMN<sup>im</sup>** ( $St0 \rightarrow St1^{Int}$ ).

b) Concerted  $N_5^{prFMN} - C_{5a}^{prFMN}$  and  $N_{10}^{prFMN} - C_{9a}^{prFMN}$  covalent bond dissociations in **prFMN<sup>im</sup>** ( $St1^{Int} \rightarrow St2^{Int}$ ).

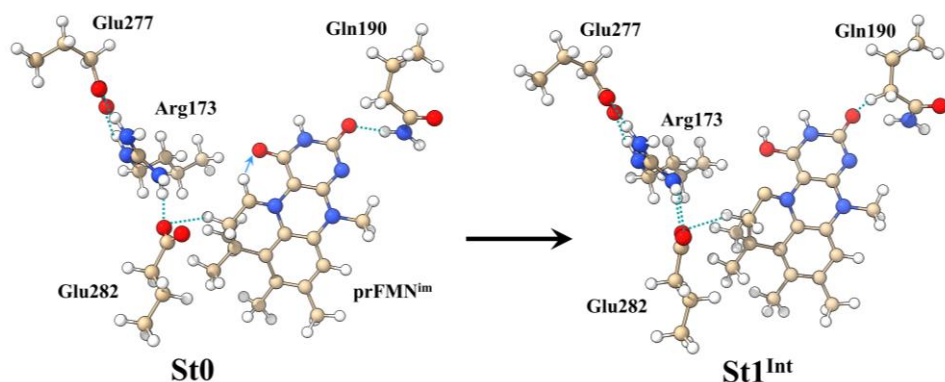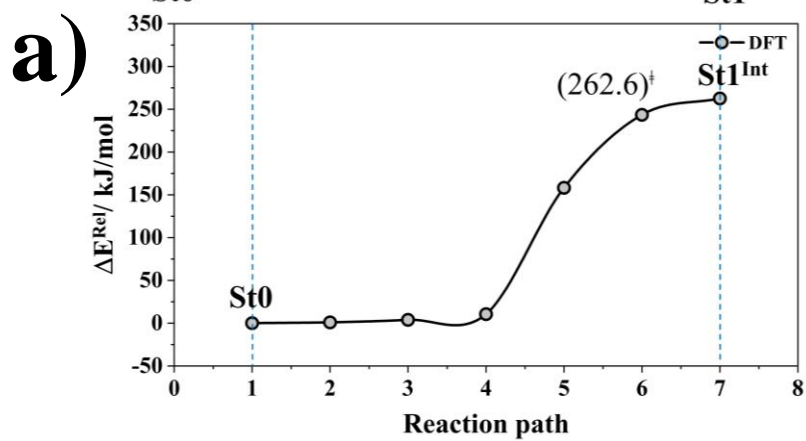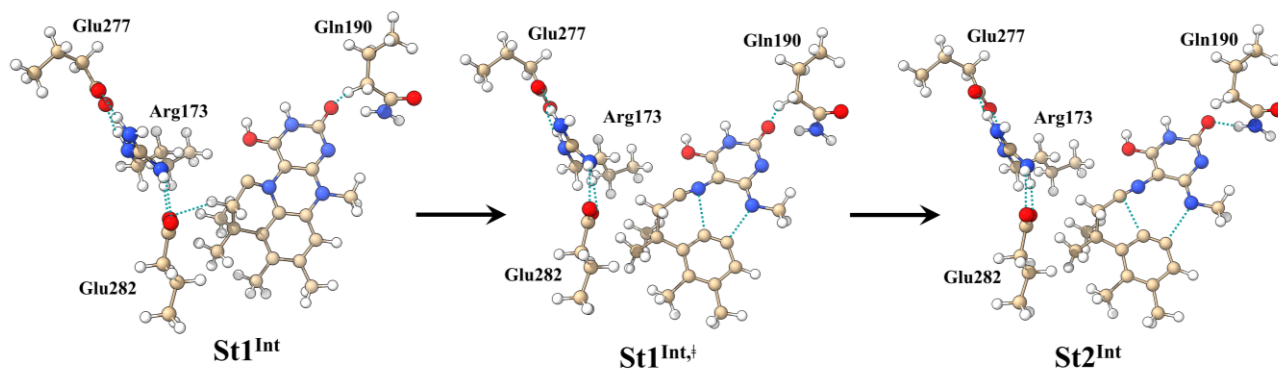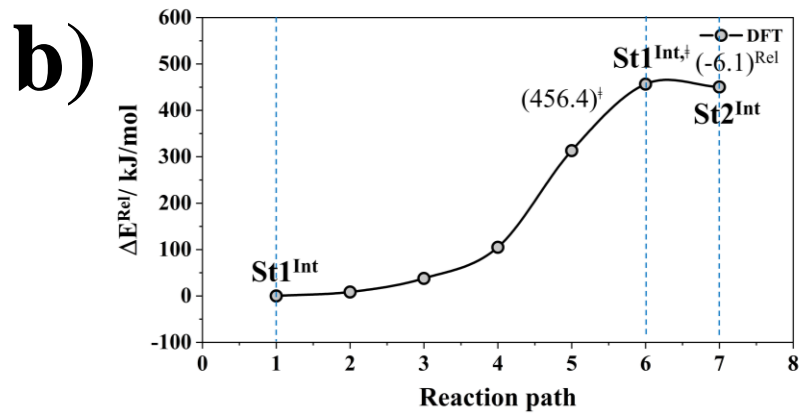

**Figure S1**

**Figure S2** The  $S_0$  PESs for the intermolecular proton transfer and concerted covalent bond dissociations ( $St0 \rightarrow St1^{Ext} \rightarrow St2^{Ext}$ ) in Type (2) mechanism<sup>5</sup> (Figure 1), obtained from the DFT/B3LYP/DZP reaction path optimizations.

a) Intermolecular proton transfer in the  $C_{1'}^{prFMN} - H \rightarrow O^{Glu282}$  H-bond between **prFMN<sup>im</sup>** and **Glu282** ( $St0 \rightarrow St1^{Ext}$ ).

b) Concerted  $N_5^{prFMN} - C_{5a}^{prFMN}$  and  $N_{10}^{prFMN} - C_{9a}^{prFMN}$  covalent bond dissociations in **prFMN<sup>im</sup>** ( $St1^{Ext} \rightarrow St2^{Ext}$ ).

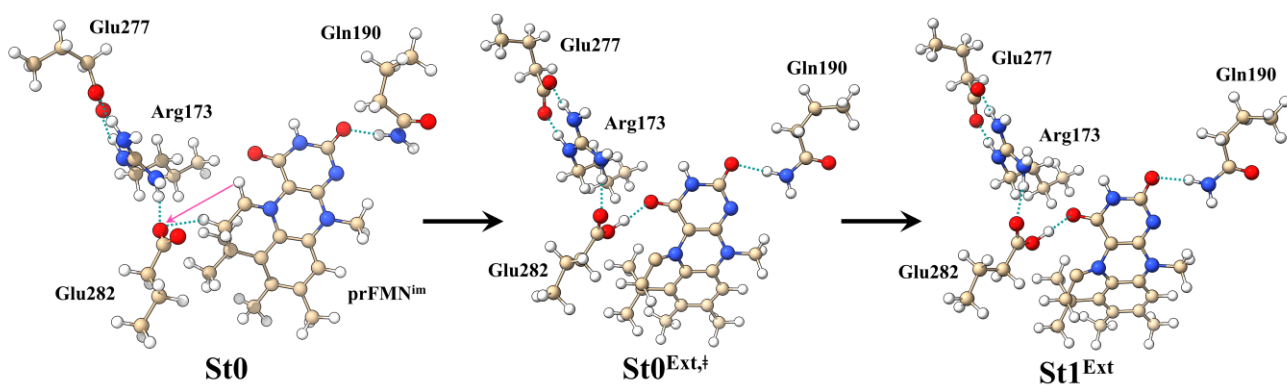

**a)**

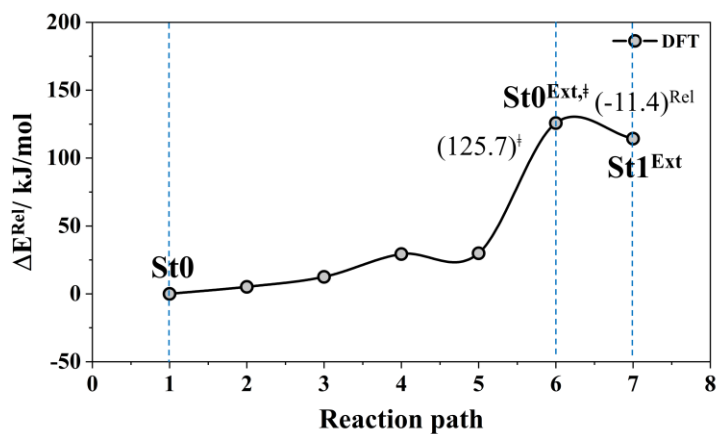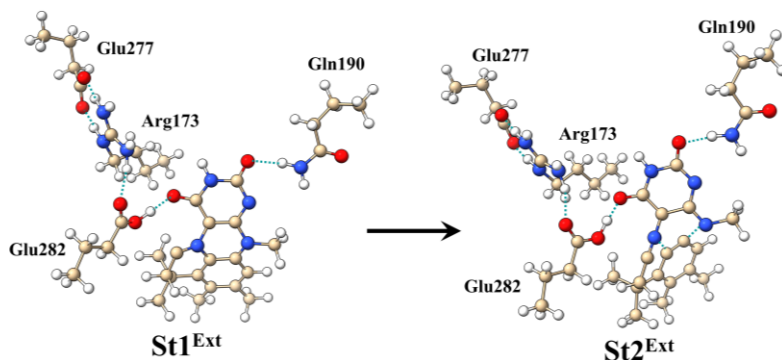

**b)**

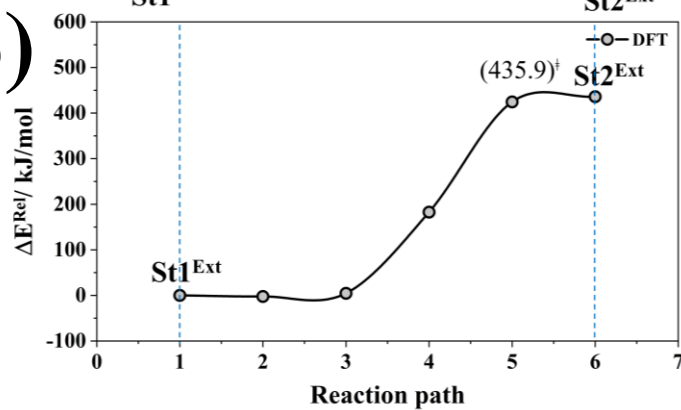

**Figure S2**

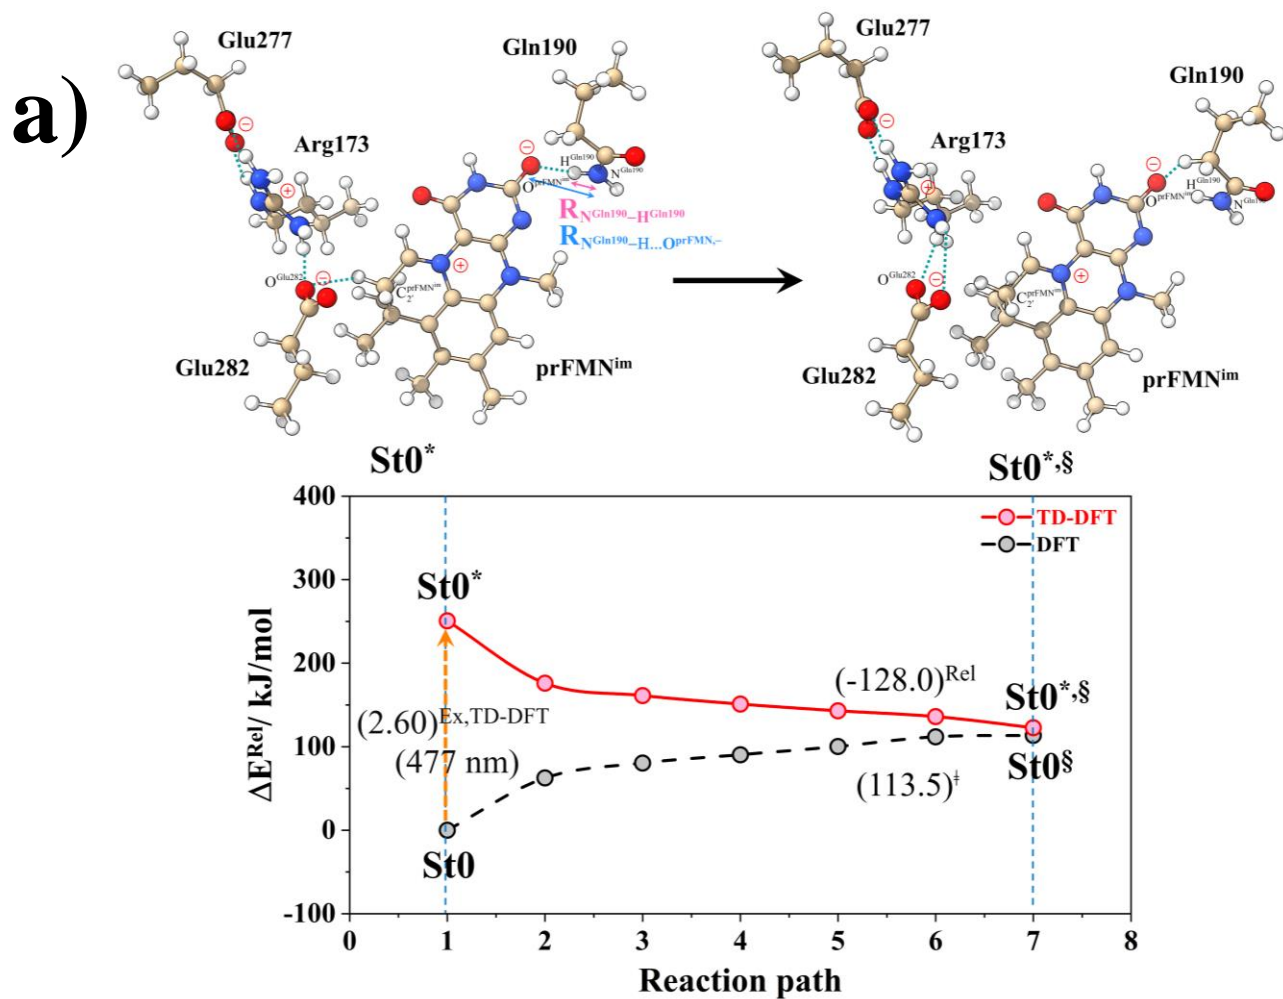

**Figure S3** a) The  $S_1$  PES (solid line) for the relaxation of the  $S_0 \rightarrow S_1$  vertically excited active site cluster to the structure at the  $S_0/S_1$  intersection ( $St0^* \rightarrow St0^{*,§}$ ), obtained from TD-DFT/B3LYP/DZP reaction path optimizations; dash line =  $S_0$  PES computed using the geometry on the  $S_1$  PES and DFT/B3LYP/DZP method. b) The variation of the  $N^{\text{Gln190}}-\text{H}\dots\text{O}^{\text{prFMN,-}}$  H-bond distances on the  $S_1$  PES, which reflects an increase in the  $N^{\text{Gln190}}-\text{H}\dots\text{O}^{\text{prFMN,-}}$  H-bond strength (red-shift) in the  $S_1$  state towards the  $S_0/S_1$  intersection.

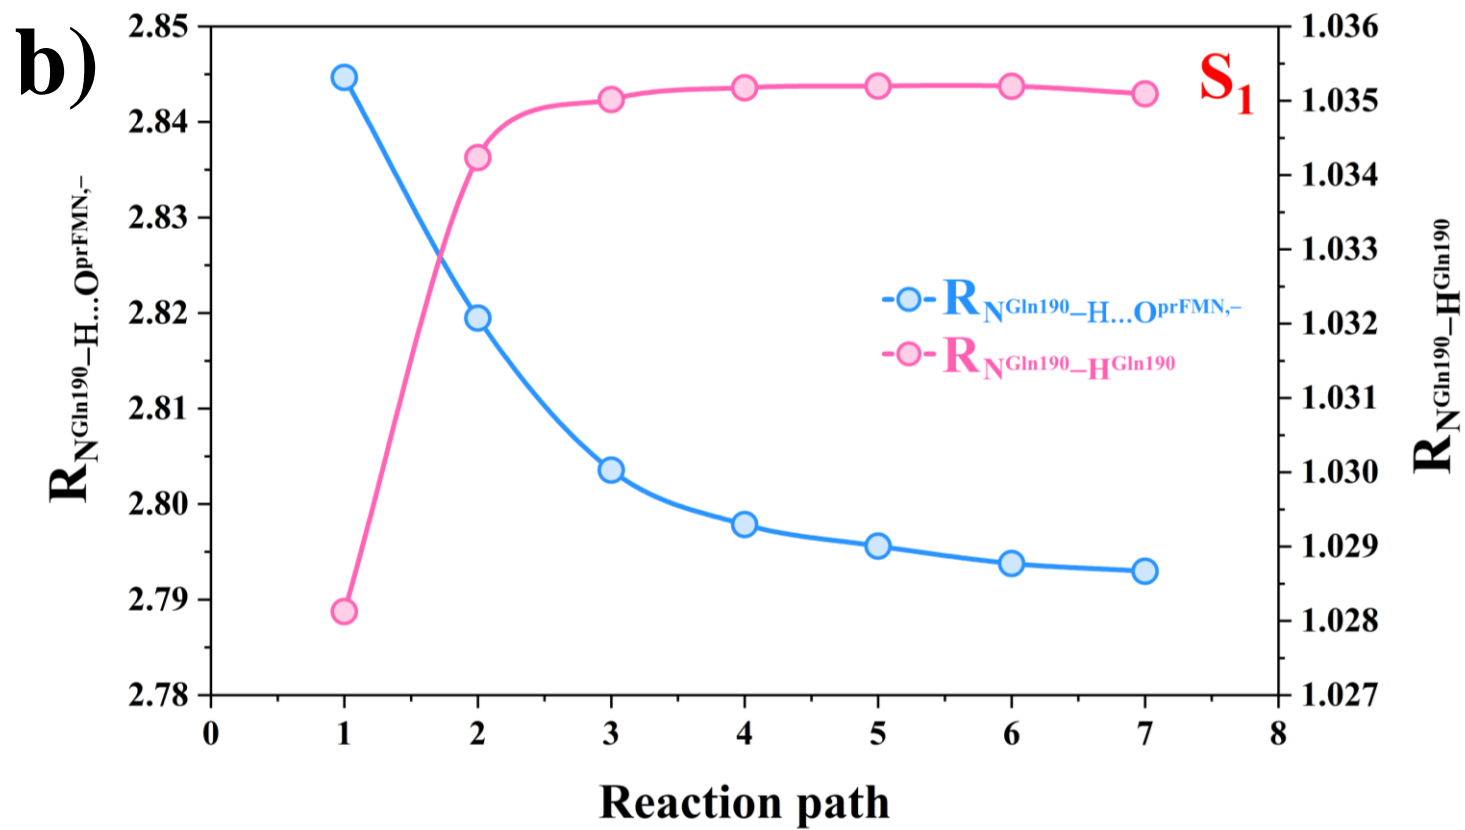

**Figure S3 (Cont.)**

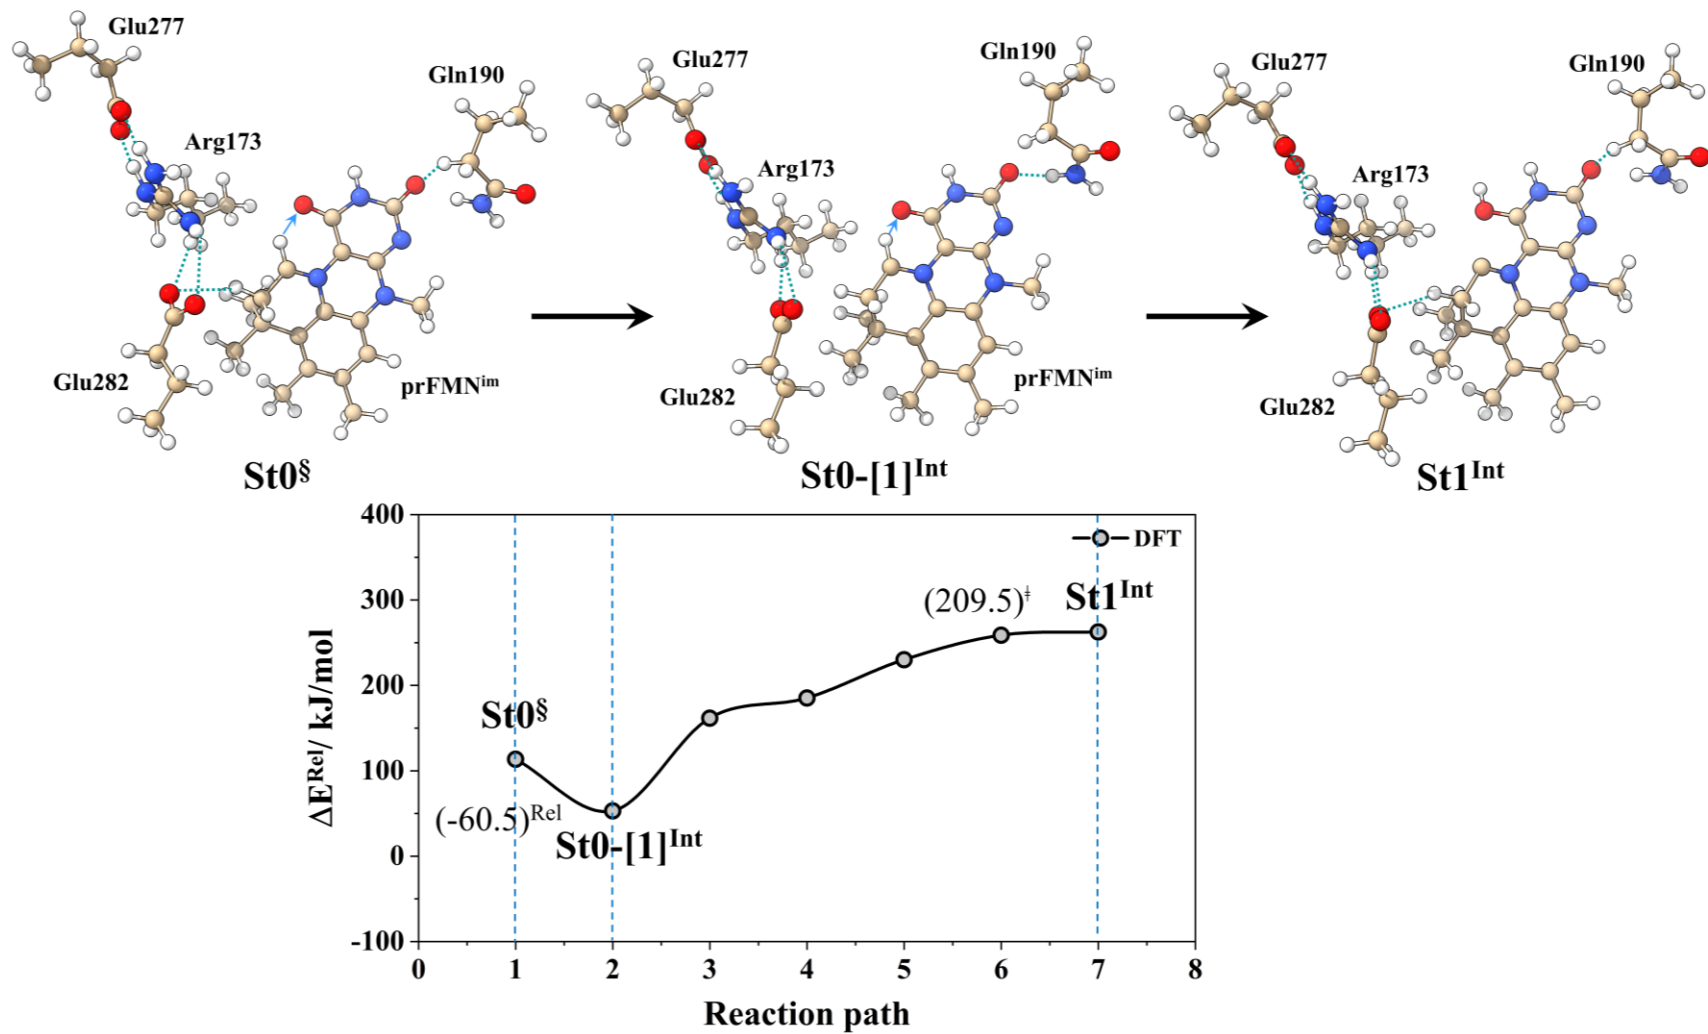

**Figure S4** The S<sub>0</sub> PES for the C<sub>1</sub><sup>prFMN</sup>-H → O<sup>prFMN<sup>im</sup></sup> intramolecular proton transfer after the S<sub>1</sub> → S<sub>0</sub> nonradiative relaxation (St0<sup>S</sup> → St1<sup>Int</sup>), obtained from DFT/B3LYP/DZP reaction path optimizations.



**Figure S5** The  $S_0$  PESs for formation of **prFMN<sup>ket</sup>** after the  $S_1 \rightarrow S_0$  nonradiative relaxation in Type (3) mechanism ( $St0^S \rightarrow St4$ ), obtained from DFT/B3LYP/DZP reaction path optimizations.

- a)  $C_1^{prFMN}-H \rightarrow O^{Glu282}$  intermolecular proton transfer ( $St0^S \rightarrow St1^{Ext}$ ).
- b) Ring expansion ( $St1^{Ext} \rightarrow St3^{Ext}$ )
- c) Reverse protonation ( $St3^{Ext} \rightarrow St4$ ).

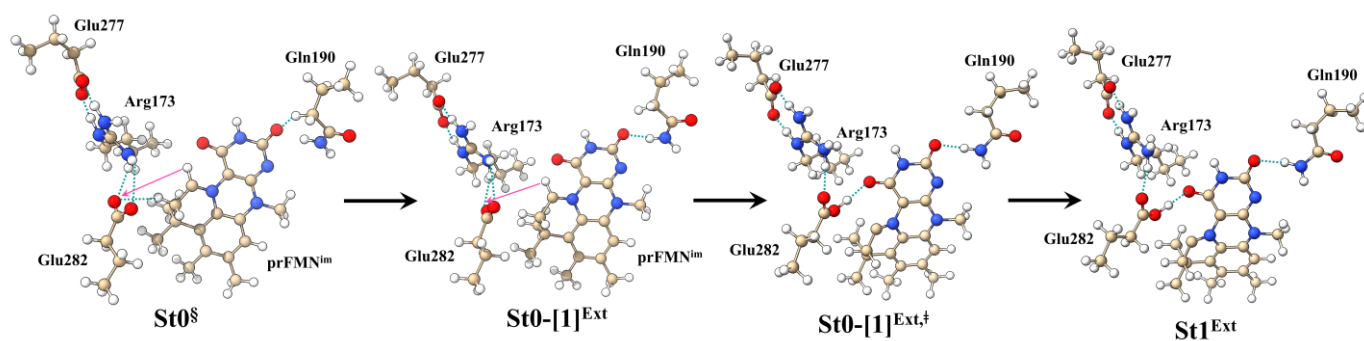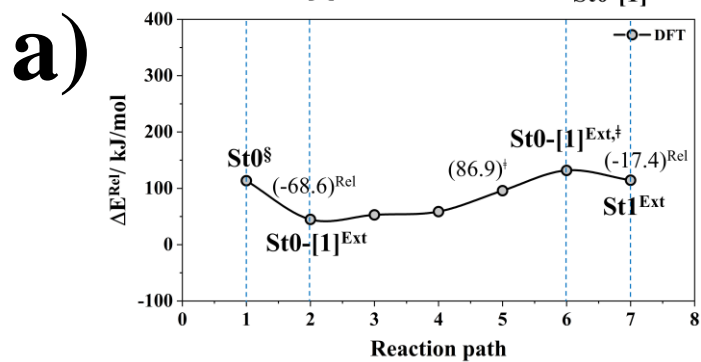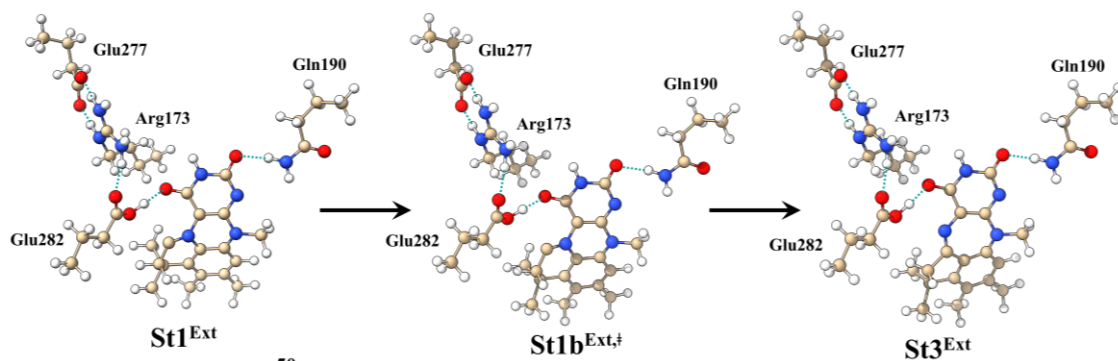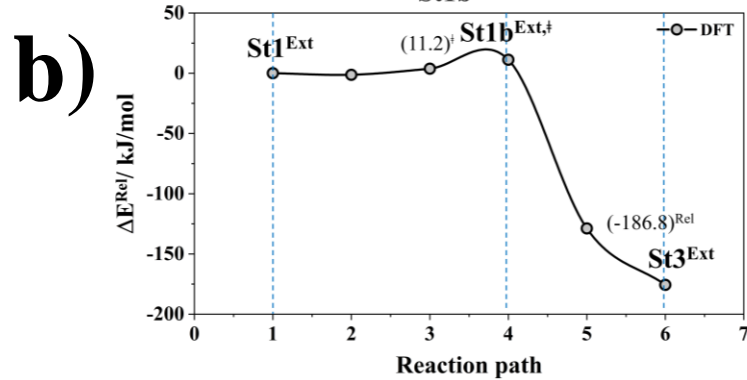

Figure S5

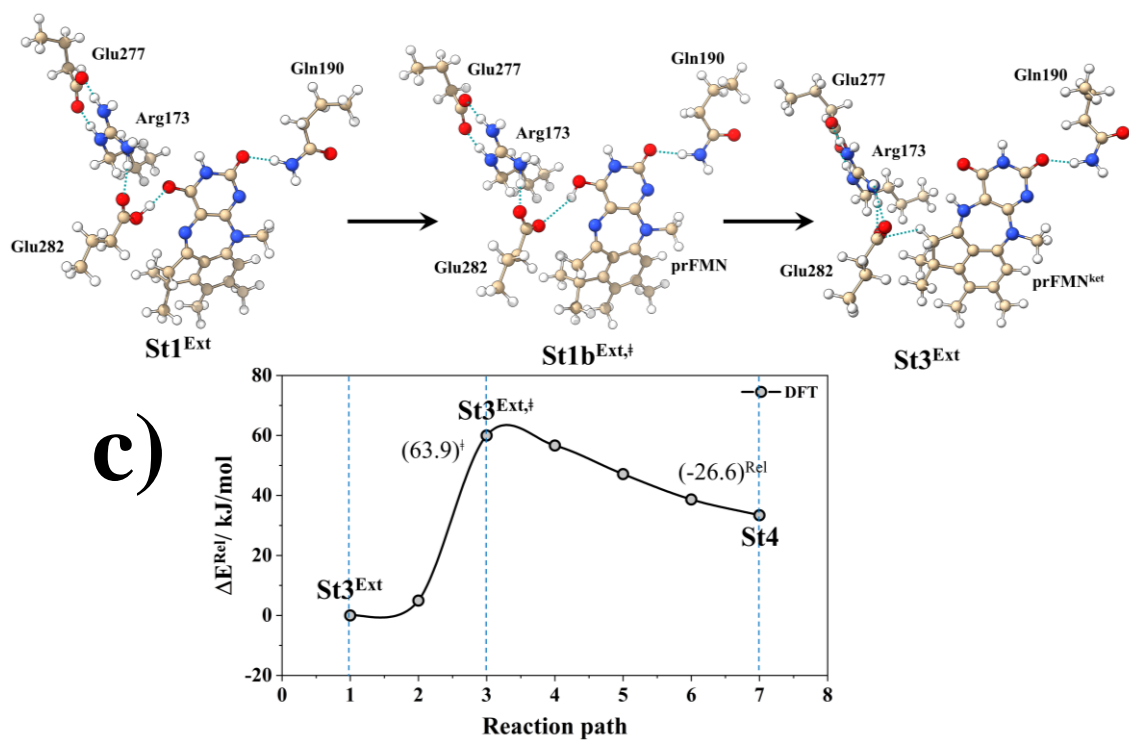

**Figure S5**

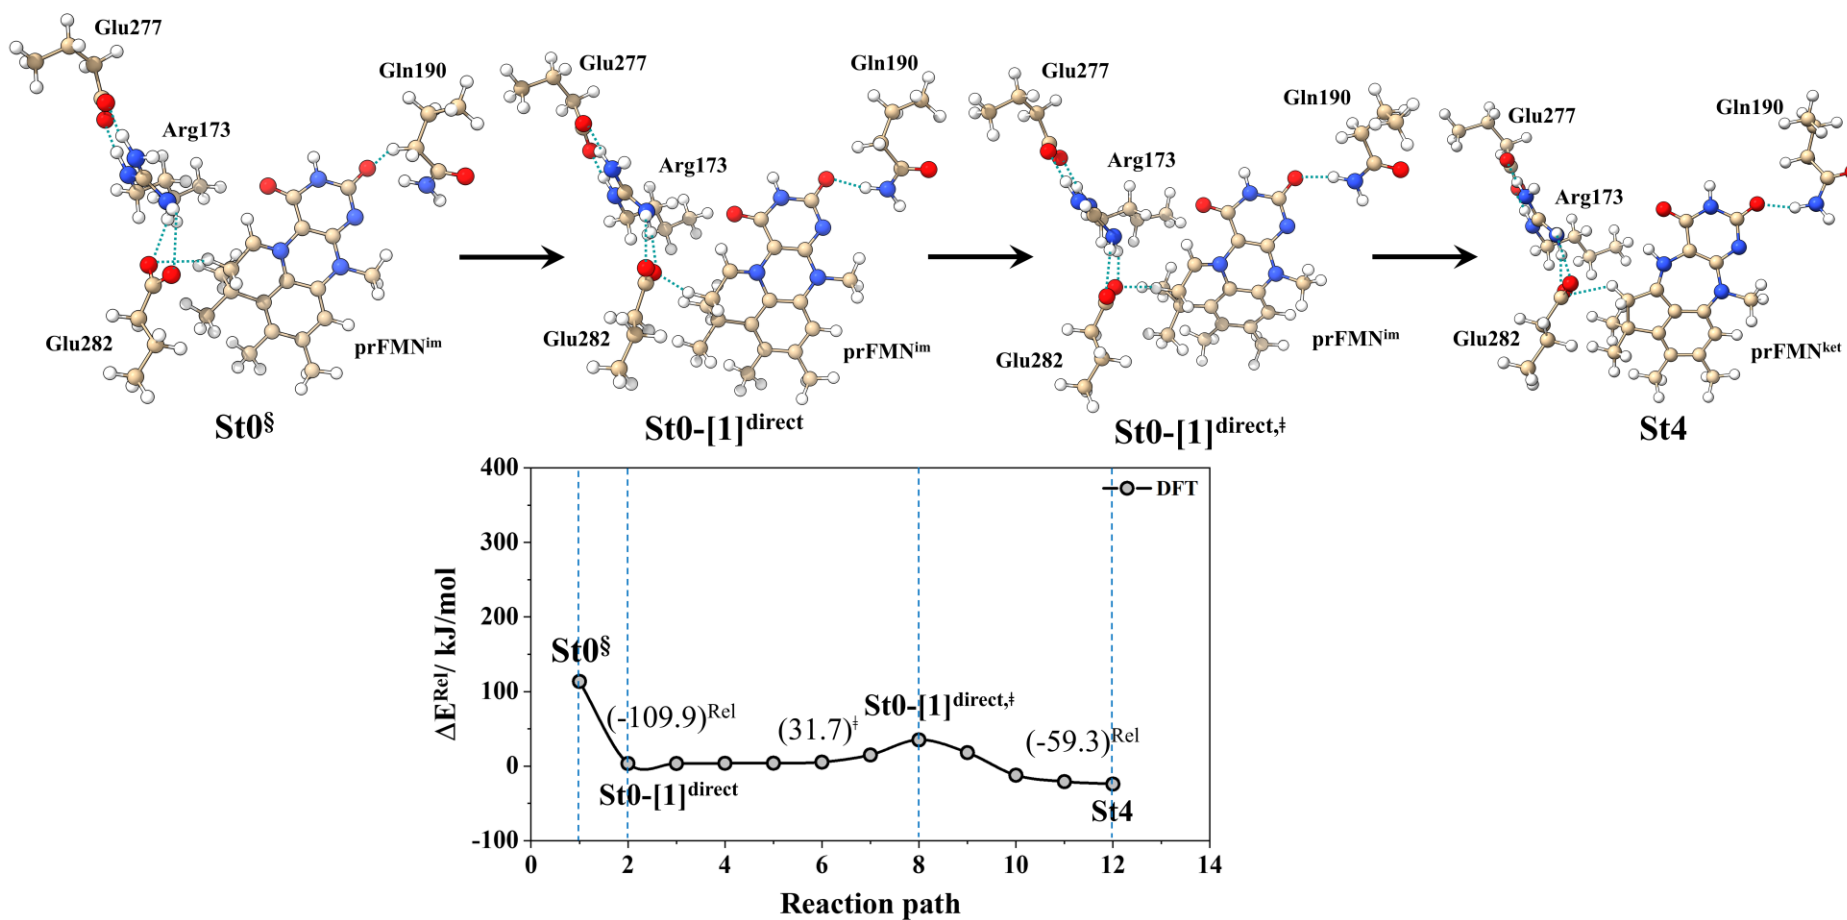

**Figure S6** The S<sub>0</sub> PES for formation of prFMN<sup>ket</sup> after the S<sub>1</sub>→S<sub>0</sub> nonradiative relaxation in Type (4) mechanism (St0<sup>S</sup>→St4). The S<sub>1</sub>→S<sub>0</sub> nonradiative relaxation is followed by concerted C<sub>1</sub><sup>prFMN</sup>-H→N<sub>5</sub><sup>prFMN</sup> intramolecular proton transfer and ring expansion (St0<sup>S</sup>→St4), obtained from DFT/B3LYP/DZP reaction path optimization.

**Table S1** Equilibrium structures and energies of molecules involved in the  $\text{prFMN}^{\text{im}} \rightarrow \text{prFMN}^{\text{ket}}$  photoisomerization obtained from DFT/B3LYP/DZP geometry optimizations.  $E^{\text{Tot}}$  = total energy in au;  $\Delta E^{\text{Ex}}$  = the  $S_0 \rightarrow S_1$  energy in eV; (...) = absorption wavelength in nm.

| Structures                                                                                                       | $E^{\text{Tot}}$ / au | $\Delta E^{\text{Ex}}$ / eV |
|------------------------------------------------------------------------------------------------------------------|-----------------------|-----------------------------|
| 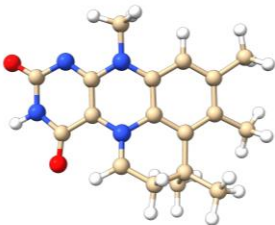<br><b>prFMN<sup>im</sup></b>   | -1066.743681          | 3.15<br>(394 nm)            |
| <br><b>prFMN<sup>ket</sup></b> | -1066.756385          | 2.25<br>(551 nm)            |
| <br><b>Arg173</b>             | -362.765659           | 7.17<br>(173 nm)            |
| <br><b>Gln190</b>             | -287.647485           | 5.75<br>(215 nm)            |
| <br><b>Glu277</b>             | -306.937343           | 5.23<br>(237 nm)            |
| <br><b>Glu282</b>             | -306.935420           | 4.79<br>(259 nm)            |

**Table S2** a) Equilibrium structures, energies and residue-to-residue (R-to-R) distances in the active site clusters on the **prFMN<sup>im</sup>→prFMN<sup>ket</sup>** photoisomerization pathways obtained from DFT/B3LYP/DZP geometry optimizations.

b) The average residue-to-residue distances and standard deviation (SD) for all the equilibrium structures of the active site clusters.

$E^{\text{Tot}}$  = total energy in au;  $\Delta E^{\text{Ex}}$  = the  $S_0 \rightarrow S_1$  energy in eV; (...) = absorption wavelength in nm; sp = single point calculation.

**Table S2a**

| Model molecular cluster                                                                                  | $E^{\text{Tot}}/ \text{au}$ | $\Delta E^{\text{Ex}}/ \text{eV}$ | R-to-R/ Å                                                                                                                                                                                                                                                                                                                                                                                                                                                                                                                                          |
|----------------------------------------------------------------------------------------------------------|-----------------------------|-----------------------------------|----------------------------------------------------------------------------------------------------------------------------------------------------------------------------------------------------------------------------------------------------------------------------------------------------------------------------------------------------------------------------------------------------------------------------------------------------------------------------------------------------------------------------------------------------|
| 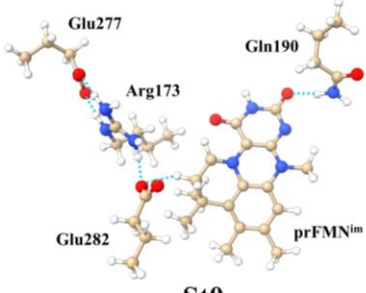 <p><b>St0</b></p>      | -2331.560638                | 2.60<br>(477 nm)                  | $R_{\text{C}_{\text{R}}^{\text{Gln190}}-\text{C}_{\text{R}}^{\text{Arg173}}} = 12.40$<br>$R_{\text{C}_{\text{R}}^{\text{Gln190}}-\text{C}_{\text{R}}^{\text{Glu277}}} = 17.47$<br>$R_{\text{C}_{\text{R}}^{\text{Gln190}}-\text{C}_{\text{R}}^{\text{Glu282}}} = 17.13$<br>$R_{\text{C}_{\text{R}}^{\text{Arg173}}-\text{C}_{\text{R}}^{\text{Glu277}}} = 9.79$<br>$R_{\text{C}_{\text{R}}^{\text{Arg173}}-\text{C}_{\text{R}}^{\text{Glu282}}} = 10.11$<br>$R_{\text{C}_{\text{R}}^{\text{Glu277}}-\text{C}_{\text{R}}^{\text{Glu282}}} = 13.25$  |
|  <p><b>St1Int</b></p>   | -2331.460634                | 2.69<br>(462 nm)                  | $R_{\text{C}_{\text{R}}^{\text{Gln190}}-\text{C}_{\text{R}}^{\text{Arg173}}} = 12.42$<br>$R_{\text{C}_{\text{R}}^{\text{Gln190}}-\text{C}_{\text{R}}^{\text{Glu277}}} = 17.48$<br>$R_{\text{C}_{\text{R}}^{\text{Gln190}}-\text{C}_{\text{R}}^{\text{Glu282}}} = 17.14$<br>$R_{\text{C}_{\text{R}}^{\text{Arg173}}-\text{C}_{\text{R}}^{\text{Glu277}}} = 9.82$<br>$R_{\text{C}_{\text{R}}^{\text{Arg173}}-\text{C}_{\text{R}}^{\text{Glu282}}} = 10.10$<br>$R_{\text{C}_{\text{R}}^{\text{Glu277}}-\text{C}_{\text{R}}^{\text{Glu282}}} = 13.26$  |
|  <p><b>St2Int</b></p> | -2331.289127 <sup>sp</sup>  | 2.96<br>(419 nm)                  | $R_{\text{C}_{\text{R}}^{\text{Gln190}}-\text{C}_{\text{R}}^{\text{Arg173}}} = 12.40$<br>$R_{\text{C}_{\text{R}}^{\text{Gln190}}-\text{C}_{\text{R}}^{\text{Glu277}}} = 17.47$<br>$R_{\text{C}_{\text{R}}^{\text{Gln190}}-\text{C}_{\text{R}}^{\text{Glu282}}} = 17.14$<br>$R_{\text{C}_{\text{R}}^{\text{Arg173}}-\text{C}_{\text{R}}^{\text{Glu277}}} = 9.80$<br>$R_{\text{C}_{\text{R}}^{\text{Arg173}}-\text{C}_{\text{R}}^{\text{Glu282}}} = 10.11$<br>$R_{\text{C}_{\text{R}}^{\text{Glu277}}-\text{C}_{\text{R}}^{\text{Glu282}}} = 13.74$  |
|  <p><b>St3Int</b></p> | -2331.559782                | 2.70<br>(460 nm)                  | $R_{\text{C}_{\text{R}}^{\text{Gln190}}-\text{C}_{\text{R}}^{\text{Arg173}}} = 12.58$<br>$R_{\text{C}_{\text{R}}^{\text{Gln190}}-\text{C}_{\text{R}}^{\text{Glu277}}} = 17.60$<br>$R_{\text{C}_{\text{R}}^{\text{Gln190}}-\text{C}_{\text{R}}^{\text{Glu282}}} = 17.20$<br>$R_{\text{C}_{\text{R}}^{\text{Arg173}}-\text{C}_{\text{R}}^{\text{Glu277}}} = 10.00$<br>$R_{\text{C}_{\text{R}}^{\text{Arg173}}-\text{C}_{\text{R}}^{\text{Glu282}}} = 10.05$<br>$R_{\text{C}_{\text{R}}^{\text{Glu277}}-\text{C}_{\text{R}}^{\text{Glu282}}} = 13.34$ |
|  <p><b>St4</b></p>    | -2331.569793                | 2.27<br>(546 nm)                  | $R_{\text{C}_{\text{R}}^{\text{Gln190}}-\text{C}_{\text{R}}^{\text{Arg173}}} = 12.48$<br>$R_{\text{C}_{\text{R}}^{\text{Gln190}}-\text{C}_{\text{R}}^{\text{Glu277}}} = 17.52$<br>$R_{\text{C}_{\text{R}}^{\text{Gln190}}-\text{C}_{\text{R}}^{\text{Glu282}}} = 17.11$<br>$R_{\text{C}_{\text{R}}^{\text{Arg173}}-\text{C}_{\text{R}}^{\text{Glu277}}} = 9.98$<br>$R_{\text{C}_{\text{R}}^{\text{Arg173}}-\text{C}_{\text{R}}^{\text{Glu282}}} = 10.04$<br>$R_{\text{C}_{\text{R}}^{\text{Glu277}}-\text{C}_{\text{R}}^{\text{Glu282}}} = 13.35$  |

**Table S2a (Cont.)**

| Model molecular cluster                                                                                             | $E^{\text{Tot}}/ \text{au}$ | $\Delta E^{\text{Ex}}/ \text{eV}$ | <b>R-to-R/ Å</b>                                                                                                                                                                                                                                                                                                                                                                                                                                              |
|---------------------------------------------------------------------------------------------------------------------|-----------------------------|-----------------------------------|---------------------------------------------------------------------------------------------------------------------------------------------------------------------------------------------------------------------------------------------------------------------------------------------------------------------------------------------------------------------------------------------------------------------------------------------------------------|
|  <p><b>St1<sup>Ext</sup></b></p>   | -2331.560638                | 3.21<br>(386 nm)                  | $R_{C_{\text{R}}^{\text{Gln190}}-C_{\text{R}}^{\text{Arg173}}} = 12.48$<br>$R_{C_{\text{R}}^{\text{Gln190}}-C_{\text{R}}^{\text{Glu277}}} = 17.52$<br>$R_{C_{\text{R}}^{\text{Gln190}}-C_{\text{R}}^{\text{Glu282}}} = 17.11$<br>$R_{C_{\text{R}}^{\text{Arg173}}-C_{\text{R}}^{\text{Glu277}}} = 9.98$<br>$R_{C_{\text{R}}^{\text{Arg173}}-C_{\text{R}}^{\text{Glu282}}} = 10.04$<br>$R_{C_{\text{R}}^{\text{Glu277}}-C_{\text{R}}^{\text{Glu282}}} = 13.35$ |
|  <p><b>St2<sup>Ext</sup></b></p>  | -2331.351063 <sup>SP</sup>  | 1.88<br>(658 nm)                  | $R_{C_{\text{R}}^{\text{Gln190}}-C_{\text{R}}^{\text{Arg173}}} = 12.39$<br>$R_{C_{\text{R}}^{\text{Gln190}}-C_{\text{R}}^{\text{Glu277}}} = 17.47$<br>$R_{C_{\text{R}}^{\text{Gln190}}-C_{\text{R}}^{\text{Glu282}}} = 17.11$<br>$R_{C_{\text{R}}^{\text{Arg173}}-C_{\text{R}}^{\text{Glu277}}} = 9.79$<br>$R_{C_{\text{R}}^{\text{Arg173}}-C_{\text{R}}^{\text{Glu282}}} = 10.08$<br>$R_{C_{\text{R}}^{\text{Glu277}}-C_{\text{R}}^{\text{Glu282}}} = 13.22$ |
|  <p><b>St3<sup>Ext</sup></b></p> | -2331.582516                | 2.67<br>(465 nm)                  | $R_{C_{\text{R}}^{\text{Gln190}}-C_{\text{R}}^{\text{Arg173}}} = 12.41$<br>$R_{C_{\text{R}}^{\text{Gln190}}-C_{\text{R}}^{\text{Glu277}}} = 17.43$<br>$R_{C_{\text{R}}^{\text{Gln190}}-C_{\text{R}}^{\text{Glu282}}} = 17.02$<br>$R_{C_{\text{R}}^{\text{Arg173}}-C_{\text{R}}^{\text{Glu277}}} = 9.93$<br>$R_{C_{\text{R}}^{\text{Arg173}}-C_{\text{R}}^{\text{Glu282}}} = 9.96$<br>$R_{C_{\text{R}}^{\text{Glu277}}-C_{\text{R}}^{\text{Glu282}}} = 13.21$  |



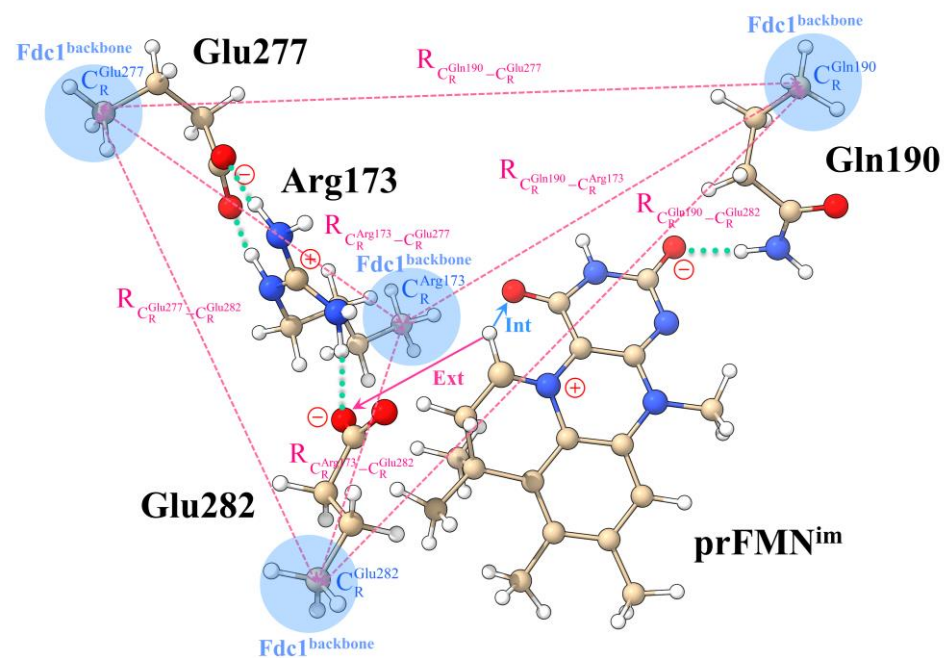

**Table S2b**

| Model molecular cluster | $R_{C_{R}^{Gln190}-C_{R}^{Arg173}}$ | $R_{C_{R}^{Gln190}-C_{R}^{Glu277}}$ | $R_{C_{R}^{Gln190}-C_{R}^{Glu282}}$ | $R_{C_{R}^{Arg173}-C_{R}^{Glu277}}$ | $R_{C_{R}^{Arg173}-C_{R}^{Glu282}}$ | $R_{C_{R}^{Glu277}-C_{R}^{Glu282}}$ |
|-------------------------|-------------------------------------|-------------------------------------|-------------------------------------|-------------------------------------|-------------------------------------|-------------------------------------|
| St0                     | 12.40                               | 17.47                               | 17.13                               | 9.79                                | 10.11                               | 13.25                               |
| St1 <sup>Int</sup>      | 12.42                               | 17.48                               | 17.14                               | 9.82                                | 10.10                               | 13.26                               |
| St3 <sup>Int</sup>      | 12.58                               | 17.60                               | 17.20                               | 10.00                               | 10.05                               | 13.34                               |
| St4                     | 12.48                               | 17.52                               | 17.11                               | 9.98                                | 10.04                               | 13.35                               |
| St1 <sup>Ext</sup>      | 12.80                               | 17.51                               | 17.06                               | 9.92                                | 9.91                                | 13.12                               |
| St3 <sup>Ext</sup>      | 12.41                               | 17.43                               | 17.02                               | 9.93                                | 9.96                                | 13.21                               |
| <b>Average±SD</b>       | <b>12.52±0.15</b>                   | <b>17.50±0.06</b>                   | <b>17.11±0.06</b>                   | <b>9.91±0.08</b>                    | <b>10.03±0.08</b>                   | <b>13.26±0.09</b>                   |

**Table S3** Thermodynamics and kinetics of the elementary reactions for the **prFMN<sup>im</sup>→prFMN<sup>ket</sup>** photoisomerization (Type **(3)** mechanism), obtained from DFT/B3LYP/DZP reaction path optimizations and TST methods. Rate constants, temperatures and energies are in s<sup>-1</sup>, K and kJ/mol, respectively;  $\Delta E^\ddagger$  = energy barriers;  $\Delta E^{\ddagger, \text{ZPC}}$  = energy barrier with the zero-point vibrational energy;  $\Delta H^\ddagger$  = activation enthalpy;  $T_c$  = crossover temperature;  $T$  = temperature;  $k_{f/r}^{\text{Q-Vib}}$  = rate constant obtained with quantized vibration correction;  $\Delta G^\ddagger$  = activation free energy;  $\Delta S^\ddagger$  = activation entropy; f/r = forward or reverse direction.

Table S3

| <b>S<sub>1</sub>→S<sub>0</sub> relaxation</b>          | <b>ΔE<sup>‡</sup></b> | <b>ΔE<sup>‡,ZPC</sup></b> | <b>ΔH<sup>‡</sup></b> | <b>T</b> | <b>k<sub>f/r</sub><sup>Q-Vib</sup></b> | <b>ΔG<sup>‡</sup></b> | <b>ΔS<sup>‡</sup></b>  |
|--------------------------------------------------------|-----------------------|---------------------------|-----------------------|----------|----------------------------------------|-----------------------|------------------------|
| <b>St0* ← St0*,§</b>                                   | 119.7                 | 107.6                     | 111.6                 | 273      | 1.61×10 <sup>-7</sup>                  | 102.2                 | 3.46×10 <sup>-2</sup>  |
|                                                        |                       |                           |                       | 277      | 3.22×10 <sup>-7</sup>                  | 102.1                 | 3.44×10 <sup>-2</sup>  |
|                                                        |                       |                           |                       | 298      | 1.03×10 <sup>-5</sup>                  | 101.5                 | 3.37×10 <sup>-2</sup>  |
|                                                        |                       |                           |                       | 303      | 2.05×10 <sup>-5</sup>                  | 101.4                 | 3.36×10 <sup>-2</sup>  |
|                                                        |                       |                           |                       | 353      | 1.06×10 <sup>-2</sup>                  | 100.2                 | 3.24×10 <sup>-2</sup>  |
| <b>Intermolecular proton transfer</b>                  | <b>ΔE<sup>‡</sup></b> | <b>ΔE<sup>‡,ZPC</sup></b> | <b>ΔH<sup>‡</sup></b> | <b>T</b> | <b>k<sub>f/r</sub><sup>Q-Vib</sup></b> | <b>ΔG<sup>‡</sup></b> | <b>ΔS<sup>‡</sup></b>  |
| <b>St0<sup>§</sup> ← St0-[1]<sup>Ext</sup></b>         | 68.6                  | 66.1                      | 66.8                  | 273      | 4.33×10 <sup>0</sup>                   | 63.3                  | 1.26×10 <sup>-2</sup>  |
|                                                        |                       |                           |                       | 277      | 6.56×10 <sup>0</sup>                   | 63.3                  | 1.25×10 <sup>-2</sup>  |
|                                                        |                       |                           |                       | 298      | 5.22×10 <sup>1</sup>                   | 63.2                  | 1.18×10 <sup>-2</sup>  |
|                                                        |                       |                           |                       | 303      | 7.91×10 <sup>1</sup>                   | 63.2                  | 1.17×10 <sup>-2</sup>  |
|                                                        |                       |                           |                       | 353      | 3.32×10 <sup>3</sup>                   | 63.1                  | 1.05×10 <sup>-2</sup>  |
| <b>St0-[1]<sup>Ext</sup> → St0-[1]<sup>Ext,‡</sup></b> | 86.9                  | 78.7                      | 78.7                  | 273      | 1.89×10 <sup>-4</sup>                  | 86.1                  | -2.74×10 <sup>-2</sup> |
|                                                        |                       |                           |                       | 277      | 3.08×10 <sup>-4</sup>                  | 86.3                  | -2.75×10 <sup>-2</sup> |
|                                                        |                       |                           |                       | 298      | 3.53×10 <sup>-3</sup>                  | 87.0                  | -2.82×10 <sup>-2</sup> |
|                                                        |                       |                           |                       | 303      | 5.76×10 <sup>-3</sup>                  | 87.2                  | -2.83×10 <sup>-2</sup> |
|                                                        |                       |                           |                       | 353      | 4.71×10 <sup>-1</sup>                  | 89.1                  | -2.95×10 <sup>-2</sup> |
| <b>St0-[1]<sup>Ext,‡</sup> ← St1<sup>Ext</sup></b>     | 17.4                  | 17.4                      | 16.3                  | 273      | 2.17×10 <sup>16</sup>                  | -18.7                 | 1.28×10 <sup>-1</sup>  |
|                                                        |                       |                           |                       | 277      | 2.44×10 <sup>16</sup>                  | -19.2                 | 1.28×10 <sup>-1</sup>  |
|                                                        |                       |                           |                       | 298      | 4.39×10 <sup>16</sup>                  | -22.0                 | 1.28×10 <sup>-1</sup>  |
|                                                        |                       |                           |                       | 303      | 4.93×10 <sup>16</sup>                  | -22.6                 | 1.28×10 <sup>-1</sup>  |
|                                                        |                       |                           |                       | 353      | 1.60×10 <sup>17</sup>                  | -29.8                 | 1.28×10 <sup>-1</sup>  |

Table S3 (Cont.)

| Ring expansion                              | $\Delta E^\ddagger$ | $\Delta E^{\ddagger, ZPC}$ | $\Delta H^\ddagger$ | T   | $k_{f/r}^{Q-Vib}$      | $\Delta G^\ddagger$ | $\Delta S^\ddagger$    |
|---------------------------------------------|---------------------|----------------------------|---------------------|-----|------------------------|---------------------|------------------------|
| $St1^{Ext} \rightarrow St1^{Ext, \ddagger}$ | 11.2                | 10.3                       | 11.2                | 273 | $4.87 \times 10^{10}$  | 10.8                | $1.53 \times 10^{-3}$  |
|                                             |                     |                            |                     | 277 | $5.22 \times 10^{10}$  | 10.8                | $1.41 \times 10^{-3}$  |
|                                             |                     |                            |                     | 298 | $7.40 \times 10^{10}$  | 11.0                | $7.85 \times 10^{-4}$  |
|                                             |                     |                            |                     | 303 | $7.94 \times 10^{10}$  | 11.0                | $6.56 \times 10^{-4}$  |
|                                             |                     |                            |                     | 353 | $1.49 \times 10^{11}$  | 11.4                | $-6.04 \times 10^{-4}$ |
| $St1^{Ext, \ddagger} \leftarrow St3^{Ext}$  | 186.8               | 186.2                      | 186.0               | 273 | $1.84 \times 10^{-25}$ | 195.9               | $-3.66 \times 10^{-2}$ |
|                                             |                     |                            |                     | 277 | $5.84 \times 10^{-25}$ | 196.1               | $-3.67 \times 10^{-2}$ |
|                                             |                     |                            |                     | 298 | $1.89 \times 10^{-22}$ | 197.1               | $-3.73 \times 10^{-2}$ |
|                                             |                     |                            |                     | 303 | $6.00 \times 10^{-22}$ | 197.3               | $-3.74 \times 10^{-2}$ |
|                                             |                     |                            |                     | 353 | $1.98 \times 10^{-17}$ | 199.6               | $-3.87 \times 10^{-2}$ |
| Reverse protonation                         | $\Delta E^\ddagger$ | $\Delta E^{\ddagger, ZPC}$ | $\Delta H^\ddagger$ | T   | $k_{f/r}^{Q-Vib}$      | $\Delta G^\ddagger$ | $\Delta S^\ddagger$    |
| $St3^{Ext} \rightarrow St3^{Ext, \ddagger}$ | 63.9                | 62.8                       | 61.8                | 273 | $6.10 \times 10^7$     | 26.0                | $1.31 \times 10^{-1}$  |
|                                             |                     |                            |                     | 277 | $9.11 \times 10^7$     | 25.5                | $1.31 \times 10^{-1}$  |
|                                             |                     |                            |                     | 298 | $6.75 \times 10^8$     | 22.6                | $1.31 \times 10^{-1}$  |
|                                             |                     |                            |                     | 303 | $1.01 \times 10^9$     | 22.0                | $1.31 \times 10^{-1}$  |
|                                             |                     |                            |                     | 353 | $3.73 \times 10^{10}$  | 15.5                | $1.31 \times 10^{-1}$  |
| $St3^{Ext, \ddagger} \leftarrow St4$        | 26.6                | 17.2                       | 19.6                | 273 | $1.75 \times 10^{11}$  | 7.9                 | $4.27 \times 10^{-2}$  |
|                                             |                     |                            |                     | 277 | $1.97 \times 10^{11}$  | 7.8                 | $4.26 \times 10^{-2}$  |
|                                             |                     |                            |                     | 298 | $3.61 \times 10^{11}$  | 7.1                 | $4.19 \times 10^{-2}$  |
|                                             |                     |                            |                     | 303 | $4.07 \times 10^{11}$  | 6.9                 | $4.18 \times 10^{-2}$  |
|                                             |                     |                            |                     | 353 | $1.22 \times 10^{12}$  | 5.3                 | $4.05 \times 10^{-2}$  |

**Table S4** Thermodynamics and kinetics of the elementary reactions for the **prFMN<sup>im</sup>→prFMN<sup>ket</sup>** photoisomerization (Type (4) mechanism), obtained from DFT/B3LYP/DZP reaction path optimizations and TST methods. Rate constants, temperatures and energies are in s<sup>-1</sup>, K and kJ/mol, respectively;  $\Delta E^\ddagger$  = energy barriers;  $\Delta E^{\ddagger,ZPC}$  = energy barrier with the zero-point vibrational energy;  $\Delta H^\ddagger$  = activation enthalpy;  $T_c$  = crossover temperature;  $T$  = temperature;  $k_{f/r}^{Q-Vib}$  = rate constant obtained with quantized vibration correction;  $\Delta G^\ddagger$  = activation free energy;  $\Delta S^\ddagger$  = activation entropy; f/r = forward or reverse direction.

**Table S4**

| <b>Intramolecular proton transfer and ring expansion</b>     |                     |                           |                     |          |                       |                       |                        |                        |
|--------------------------------------------------------------|---------------------|---------------------------|---------------------|----------|-----------------------|-----------------------|------------------------|------------------------|
|                                                              | $\Delta E^\ddagger$ | $\Delta E^{\ddagger,ZPC}$ | $\Delta H^\ddagger$ | <b>T</b> | $k_{f/r}^{Q-Vib}$     | $\Delta G^\ddagger$   | $\Delta S^\ddagger$    |                        |
| <b>St0<sup>§</sup> ← St0-[1]<sup>direct</sup></b>            |                     |                           |                     | 273      | $3.05 \times 10^{-7}$ | 100.7                 | $3.23 \times 10^{-2}$  |                        |
|                                                              |                     |                           |                     | 277      | $6.01 \times 10^{-7}$ | 100.6                 | $3.22 \times 10^{-2}$  |                        |
|                                                              |                     | 109.9                     | 107.0               | 109.5    | 298                   | $1.81 \times 10^{-5}$ | 100.1                  | $3.16 \times 10^{-2}$  |
|                                                              |                     |                           |                     |          | 303                   | $3.57 \times 10^{-5}$ | 100.0                  | $3.14 \times 10^{-2}$  |
|                                                              |                     |                           |                     |          | 353                   | $1.64 \times 10^{-2}$ | 98.9                   | $3.02 \times 10^{-2}$  |
| <b>St0-[1]<sup>direct</sup> → St0-[1]<sup>direct,‡</sup></b> |                     |                           |                     | 273      | $1.08 \times 10^0$    | 66.5                  | $-1.35 \times 10^{-1}$ |                        |
|                                                              |                     |                           |                     | 277      | $1.30 \times 10^0$    | 67.0                  | $-1.35 \times 10^{-1}$ |                        |
|                                                              |                     | 31.7                      | 29.0                | 29.7     | 298                   | $3.26 \times 10^0$    | 70.1                   | $-1.36 \times 10^{-1}$ |
|                                                              |                     |                           |                     |          | 303                   | $3.92 \times 10^0$    | 70.8                   | $-1.36 \times 10^{-1}$ |
|                                                              |                     |                           |                     |          | 353                   | $2.07 \times 10^1$    | 78.0                   | $-1.37 \times 10^{-1}$ |
| <b>St0-[1]<sup>direct,‡</sup> ← St4</b>                      |                     |                           |                     | 273      | $1.91 \times 10^{-5}$ | 91.3                  | $-1.26 \times 10^{-1}$ |                        |
|                                                              |                     |                           |                     | 277      | $2.73 \times 10^{-5}$ | 91.8                  | $-1.26 \times 10^{-1}$ |                        |
|                                                              |                     | 59.3                      | 57.2                | 56.9     | 298                   | $1.60 \times 10^{-4}$ | 94.7                   | $-1.27 \times 10^{-1}$ |
|                                                              |                     |                           |                     |          | 303                   | $2.28 \times 10^{-4}$ | 95.4                   | $-1.27 \times 10^{-1}$ |
|                                                              |                     |                           |                     |          | 353                   | $5.51 \times 10^{-3}$ | 102.1                  | $-1.28 \times 10^{-1}$ |

**Table S5** Thermodynamic properties of the elementary reactions in Type (3) and Type (4) mechanisms, obtained based on the hypothesized photo-to-thermal pathway in Figure 4 and from the DFT/B3LYP/DZP, TD-DFT/B3LYP/DZP and TST methods.

| <b>a)</b><br>Type (3) | $\text{St0}^* \rightarrow \text{St0-[1]}^{\text{Ext}}$<br>(I)* $\rightarrow$ (III) |                        | $\text{St0}^* \rightarrow \text{St0-[1]}^{\text{Ext},\ddagger}$<br>(I)* $\rightarrow$ (IV) $\ddagger$ |                        | $\text{St0}^* \rightarrow \text{St1}^{\text{Ext}}$<br>(I)* $\rightarrow$ (V) |                        | $\text{St0}^* \rightarrow \text{St3}^{\text{Ext}}$ |                        | $\text{St0}^* \rightarrow \text{St4}$ |                               |
|-----------------------|------------------------------------------------------------------------------------|------------------------|-------------------------------------------------------------------------------------------------------|------------------------|------------------------------------------------------------------------------|------------------------|----------------------------------------------------|------------------------|---------------------------------------|-------------------------------|
|                       | T                                                                                  | $\Delta G^\circ$       | $\Delta S^\circ$                                                                                      | $\Delta G^\circ$       | $\Delta S^\circ$                                                             | $\Delta G^\circ$       | $\Delta S^\circ$                                   | $\Delta G^\circ$       | $\Delta S^\circ$                      | $\Delta G^{\circ,\text{Tot}}$ |
| 273                   | -165.5                                                                             | $-4.72 \times 10^{-2}$ | -79.4                                                                                                 | $-7.45 \times 10^{-2}$ | -60.66                                                                       | $-2.03 \times 10^{-1}$ | -245.8                                             | $-1.65 \times 10^{-1}$ | -227.7                                | $-7.61 \times 10^{-2}$        |
| 277                   | -165.4                                                                             | $-4.69 \times 10^{-2}$ | -79.1                                                                                                 | $-7.44 \times 10^{-2}$ | -59.90                                                                       | $-2.03 \times 10^{-1}$ | -245.2                                             | $-1.65 \times 10^{-1}$ | -227.5                                | $-7.59 \times 10^{-2}$        |
| 298                   | -164.8                                                                             | $-4.56 \times 10^{-2}$ | -77.7                                                                                                 | $-7.37 \times 10^{-2}$ | -55.75                                                                       | $-2.02 \times 10^{-1}$ | -241.9                                             | $-1.64 \times 10^{-1}$ | -226.3                                | $-7.45 \times 10^{-2}$        |
| 303                   | -164.6                                                                             | $-4.53 \times 10^{-2}$ | -77.4                                                                                                 | $-7.36 \times 10^{-2}$ | -54.85                                                                       | $-2.02 \times 10^{-1}$ | -241.1                                             | $-1.64 \times 10^{-1}$ | -226.0                                | $-7.43 \times 10^{-2}$        |
| 353                   | -163.3                                                                             | $-4.28 \times 10^{-2}$ | -74.2                                                                                                 | $-7.24 \times 10^{-2}$ | -45.26                                                                       | $-2.01 \times 10^{-1}$ | -233.4                                             | $-1.63 \times 10^{-1}$ | -223.2                                | $-7.18 \times 10^{-2}$        |

| <b>b)</b><br>Type (4) | $\text{St0}^* \rightarrow \text{St0-[1]}^{\text{Ext}}$<br>(I)* $\rightarrow$ (III) |                        | $\text{St0}^* \rightarrow \text{St0-[1]}^{\text{Ext},\ddagger}$<br>(I)* $\rightarrow$ (IV) $\ddagger$ |                        | $\text{St0}^* \rightarrow \text{St1}$<br>(I)* $\rightarrow$ (V) |                               |
|-----------------------|------------------------------------------------------------------------------------|------------------------|-------------------------------------------------------------------------------------------------------|------------------------|-----------------------------------------------------------------|-------------------------------|
|                       | T                                                                                  | $\Delta G^\circ$       | $\Delta S^\circ$                                                                                      | $\Delta G^\circ$       | $\Delta S^\circ$                                                | $\Delta G^{\circ,\text{Tot}}$ |
| 273                   | -202.9                                                                             | $-6.69 \times 10^{-2}$ | -136.4                                                                                                | $-2.02 \times 10^{-1}$ | -227.7                                                          | $-7.59 \times 10^{-2}$        |
| 277                   | -202.7                                                                             | $-6.66 \times 10^{-2}$ | -135.7                                                                                                | $-2.02 \times 10^{-1}$ | -227.5                                                          | $-7.56 \times 10^{-2}$        |
| 298                   | -201.7                                                                             | $-6.53 \times 10^{-2}$ | -131.6                                                                                                | $-2.01 \times 10^{-1}$ | -226.3                                                          | $-7.43 \times 10^{-2}$        |
| 303                   | -201.4                                                                             | $-6.50 \times 10^{-2}$ | -130.7                                                                                                | $-2.01 \times 10^{-1}$ | -226.0                                                          | $-7.40 \times 10^{-2}$        |
| 353                   | -199.1                                                                             | $-6.26 \times 10^{-2}$ | -121.1                                                                                                | $-2.00 \times 10^{-1}$ | -223.2                                                          | $-7.15 \times 10^{-2}$        |

$\Delta G^\circ$  and  $\Delta H^\circ$  = Gibbs free energy and enthalpy in kJ/mol;  $\Delta S^\circ$  = entropy in kJ/mol·K;  $\Delta G^{\circ,\text{Tot}}$  = total reaction Gibbs free energy for  $\text{prFMN}^{\text{im}} \rightarrow \text{prFMN}^{\text{ket}}$  and;  $\Delta S^{\circ,\text{Rx}}$  = reaction entropy of all the elementary processes; T = temperature in K.
